# Supplementary material
Source: publisher figshare collection journal article supplement (https://karger.figshare.com/articles/dataset/_/4570027)
Supplement: Supplementary file 1 [file 1]

Supplementary table 2. Results of Egger's test for publication bias.

| Genetic model               | <i>P</i> value from Egger's test |
|-----------------------------|----------------------------------|
| GC vs. GG                   | 0.780                            |
| CC vs. GG                   | 0.960                            |
| Allelic (C vs. G)           | 0.564                            |
| Dominant (GC+CC vs. GG)     | 0.844                            |
| Recessive (CC vs. GC+GG)    | 0.750                            |
| Overdominant (GC vs. GG+CC) | 0.668                            |
