# Supplementary material
Source: publisher figshare collection journal article supplement (https://karger.figshare.com/articles/dataset/_/4570027)
Supplement: Supplementary file 3 [file 1]

**Supplementary Table 1.** Methodological quality of the included studies assessed according to Newcastle-Ottawa Scale.

| Authors [ref]                                    | Year | Is the case definition adequate? | Representativeness of the cases | Selection of Controls | Definition of Controls | Comparability of cases and controls | Ascertainment of exposure | Same method of ascertainment for cases and controls | Non-Response rate | Total |
|--------------------------------------------------|------|----------------------------------|---------------------------------|-----------------------|------------------------|-------------------------------------|---------------------------|-----------------------------------------------------|-------------------|-------|
| Horikawa et al. [14]                             | 2008 | *                                | *                               | -                     | *                      | **                                  | *                         | *                                                   | -                 | 8     |
| Jazdzewski et al. (Finland) [11]                 | 2008 | *                                | *                               | *                     | *                      | -                                   | *                         | -                                                   | *                 | 6     |
| Jazdzewski et al. (Poland) [11]                  | 2008 | *                                | *                               | *                     | *                      | -                                   | *                         | -                                                   | *                 | 6     |
| Jazdzewski et al. (USA) [11]                     | 2008 | *                                | *                               | *                     | *                      | -                                   | *                         | -                                                   | *                 | 6     |
| Xu et al. [15]                                   | 2008 | *                                | *                               | -                     | *                      | **                                  | *                         | *                                                   | *                 | 8     |
| Yang et al. [16]                                 | 2008 | *                                | *                               | -                     | *                      | **                                  | *                         | *                                                   | *                 | 9     |
| Hoffman et al. [18]                              | 2009 | *                                | *                               | -                     | *                      | **                                  | *                         | *                                                   | *                 | 8     |
| Hu et al. [19]                                   | 2009 | *                                | *                               | -                     | *                      | **                                  | *                         | *                                                   | *                 | 9     |
| Tian et al. [20]                                 | 2009 | *                                | *                               | -                     | *                      | **                                  | *                         | *                                                   | *                 | 9     |
| Catucci et al. (Germany) [21]                    | 2010 | *                                | -                               | -                     | *                      | *                                   | *                         | *                                                   | *                 | 7     |
| Guo et al. [22]                                  | 2010 | *                                | *                               | *                     | *                      | **                                  | *                         | *                                                   | *                 | 8     |
| Liu et al. [23]                                  | 2010 | *                                | *                               | -                     | *                      | **                                  | *                         | *                                                   | *                 | 8     |
| Okubo et al. [24] (controls with ulcer diseases) | 2010 | *                                | *                               | *                     | *                      | **                                  | *                         | *                                                   | -                 | 7     |
| Okubo et al. [24] (healthy controls)             | 2010 | *                                | *                               | -                     | *                      | **                                  | *                         | *                                                   | -                 | 7     |
| Pastrello et al. [25]                            | 2010 | *                                | -                               | -                     | *                      | -                                   | *                         | *                                                   | *                 | 6     |
| Srivastava et al. [26]                           | 2010 | *                                | *                               | *                     | *                      | **                                  | *                         | *                                                   | *                 | 9     |
| Xu et al. [13]                                   | 2010 | *                                | *                               | -                     | *                      | **                                  | *                         | *                                                   | *                 | 8     |
| Zeng et al. [27]                                 | 2010 | *                                | *                               | -                     | *                      | **                                  | *                         | *                                                   | *                 | 8     |
| Akkiz et al. [28]                                | 2011 | *                                | *                               | -                     | *                      | **                                  | *                         | *                                                   | *                 | 8     |
| Garcia et al. [29]                               | 2011 | *                                | -                               | -                     | *                      | *                                   | *                         | *                                                   | *                 | 6     |
| Hishida et al. [31]                              | 2011 | *                                | *                               | -                     | *                      | **                                  | *                         | *                                                   | *                 | 8     |
| Permuth-Wey et al. [33]                          | 2011 | *                                | *                               | -                     | *                      | -                                   | *                         | *                                                   | *                 | 7     |
| Vinci et al. [34]                                | 2011 | *                                | *                               | -                     | *                      | -                                   | *                         | *                                                   | *                 | 6     |
| Yue et al. [35]                                  | 2011 | *                                | *                               | *                     | *                      | **                                  | *                         | *                                                   | *                 | 8     |

|                                     |      |   |   |   |   |    |   |   |   |   |
|-------------------------------------|------|---|---|---|---|----|---|---|---|---|
| Zhou et al. [37]                    | 2011 | * | * | - | * | -  | * | * | * | 6 |
| Chu et al. [39]                     | 2012 | * | - | * | - | ** | * | * | * | 7 |
| Hezova et al. [41]                  | 2012 | * | * | - | * | ** | * | * | * | 8 |
| Jones et al. [42]                   | 2012 | * | * | - | * | -  | * | - | * | 6 |
| Kim et al. [43]                     | 2012 | * | * | - | * | ** | * | * | * | 9 |
| Mihalache et al. [44]               | 2012 | * | * | - | * | -  | * | * | * | 6 |
| Min et al. [45]                     | 2012 | * | * | - | * | ** | * | * | * | 8 |
| Wang et al. [46]                    | 2012 | * | * | - | * | ** | * | * | * | 8 |
| Xiang et al. [47]                   | 2012 | * | * | * | * | -  | * | * | * | 6 |
| Zhou et al. [48]                    | 2012 | * | * | - | * | ** | * | * | * | 8 |
| Zhou et al. [49]                    | 2012 | * | * | * | * | ** | * | * | * | 8 |
| Ahn et al. [50]                     | 2013 | * | * | * | * | ** | * | * | * | 8 |
| Chae et al. [51]                    | 2013 | * | * | * | * | ** | * | * | * | 8 |
| Lung et al. [52]                    | 2013 | * | * | - | * | ** | * | * | * | 9 |
| Lung et al. [52] (elderly controls) | 2013 | * | * | - | * | ** | * | * | * | 9 |
| Lv et al. [53]                      | 2013 | * | * | - | * | -  | * | * | * | 7 |
| Ma et al. [54]                      | 2013 | * | * | - | * | ** | * | * | * | 8 |
| Marino et al. [55]                  | 2013 | * | * | - | * | -  | * | * | * | 6 |
| Orsos et al. [56]                   | 2013 | * | * | - | * | ** | * | * | * | 8 |
| Pavlakakis et al. [57]              | 2013 | * | * | * | * | -  | * | * | * | 6 |
| Song et al. [59] <sup>a</sup>       | 2013 | * | * | - | * | ** | * | * | * | 8 |
| Vinci et al. [60]                   | 2013 | * | * | * | * | ** | * | * | * | 8 |
| Wei et al. [61]                     | 2013 | * | * | - | * | ** | * | * | * | 9 |
| Wei et al. [62]                     | 2013 | * | * | - | * | ** | * | * | * | 8 |
| Zhang et al. [64]                   | 2013 | * | * | * | * | ** | * | * | * | 9 |
| Chu et al. [65]                     | 2014 | * | * | - | * | ** | * | * | * | 8 |
| Cong et al. [66]                    | 2014 | * | * | - | * | ** | * | * | * | 8 |
| Dikeakos et al. [67]                | 2014 | * | * | - | * | -  | * | * | * | 7 |
| Du et al. [68]                      | 2014 | * | * | - | * | ** | * | * | * | 8 |

|                                                      |      |   |   |   |   |    |   |   |   |   |
|------------------------------------------------------|------|---|---|---|---|----|---|---|---|---|
| Hu et al. [69]                                       | 2014 | * | * | - | * | -  | * | * | - | 5 |
| Huang et al. [70]                                    | 2014 | * | * | - | * | ** | * | * | * | 8 |
| Jeon et al. [71]                                     | 2014 | * | * | - | * | ** | * | * | * | 8 |
| Jia et al. [72]                                      | 2014 | * | * | * | * | -  | * | * | * | 6 |
| Kupcinkas et al. [73]                                | 2014 | * | * | - | * | ** | * | * | * | 8 |
| Kupcinkas et al. [74]                                | 2014 | * | * | * | - | ** | * | * | * | 8 |
| Mao et al. [75]                                      | 2014 | * | * | - | * | ** | * | * | * | 9 |
| Nikolic et al. [76]                                  | 2014 | * | * | - | * | *  | * | * | * | 7 |
| Palmieri et al. [78] (controls from Tuscany, HapMap) | 2014 | * | * | - | * | -  | * | - | * | 5 |
| Palmieri et al. [78] (controls from Marino et al.)   | 2014 | * | * | - | * | -  | * | - | * | 5 |
| Palmieri et al. [78] (controls from Manna et al.)    | 2014 | * | * | - | * | -  | * | * | * | 6 |
| Parlayan et al. [79] (gastric cancer)                | 2014 | * | - | - | * | ** | * | * | * | 7 |
| Parlayan et al. [79] (lung cancer)                   | 2014 | * | - | * | * | ** | * | * | * | 7 |
| Parlayan et al. [79] (prostate cancer)               | 2014 | * | - | - | * | ** | * | * | * | 7 |
| Pu et al. [80]                                       | 2014 | * | * | * | * | ** | * | * | * | 8 |
| Qu et al. [82]                                       | 2014 | * | * | * | * | ** | * | * | * | 9 |

<sup>a</sup> Study included in the meta-analysis of association under dominant genetic model
